# Supplementary material
Source: PubMed Central journal article supplement (PMC8862714)

## Supplementary Table S1

### *Characteristics of Participant Samples and Interventions in Included Studies*

| Study<br>Authors, Year     | Mean CA in<br>Months | Mean LA in<br>Months | Interventionist<br>Type | Total Intervention<br>Hours |
|----------------------------|----------------------|----------------------|-------------------------|-----------------------------|
| Boyd et al., 2018          | 49.6                 | ---                  | Educator                | 17.2                        |
| Brian et al., 2017         | 25.2                 | 13.1                 | Caregiver               | ---                         |
| Brian et al., 2018         | 49.6                 | ---                  | Educator                | 17.2                        |
| Chang et al., 2016         | 50                   | 31.5                 | Educator                | ---                         |
| Dawson et al., 2010        | 23.5                 | ---                  | Combination             | 3276                        |
| Drew et al., 2002          | 22.5                 | ---                  | Caregiver               | ---                         |
| Duifhuis et al., 2017      | 69.5                 | ---                  | Caregiver               | ---                         |
| Estes et al., 2015         | 23.5                 | ---                  | Combination             | 3276                        |
| Hardan et al., 2015        | 49.2                 | ---                  | Caregiver               | ---                         |
| Howlin & Rutter, 1989      | 75.4                 | 31.4                 | Caregiver               | ---                         |
| Ingersoll, 2012            | 38                   | 16.8                 | Clinician               | 30                          |
| Ingersoll et al., 2016     | 43.7                 | ---                  | Caregiver               | ---                         |
| Jocelyn et al., 1998       | 43.3                 | ---                  | Combination             | ---                         |
| Kaale et al., 2014         | 48.8                 | 21.5                 | Educator                | 25                          |
| Kasari et al., 2008        | 42.6                 | 20.1                 | Clinician               | 14.3                        |
| Kasari et al., 2008        | 42.3                 | 20.5                 | Clinician               | 17.35                       |
| Kasari et al., 2015        | 31.5                 | 13.9                 | Caregiver               | ---                         |
| Landa et al., 2011         | 28.8                 | ---                  | Clinician               | 205.66                      |
| Lawton & Kasari, 2012      | 44.7                 | ---                  | Educator                | 8.3                         |
| Nefdt et al., 2010         | 38.7                 | ---                  | Caregiver               | ---                         |
| Roberts et al., 2011       | 42.6                 | ---                  | Combination             | 36                          |
| Roberts et al., 2011       | 43.4                 | ---                  | Clinician               | 72                          |
| Rogers et al., 2006        | 38.4                 | 12                   | Caregiver               | 75                          |
| Rogers et al., 2012        | 21                   | ---                  | Caregiver               | ---                         |
| Schreibman & Stahmer, 2014 | 29.2                 | ---                  | Combination             | 247                         |
| Shire et al., 2017         | 31.6                 | 16.9                 | Educator                | 19.25                       |
| Vivanti et al., 2014       | 41.2                 | 19                   | Combination             | 1023.4                      |
| Wetherby & Woods, 2006     | 18.19                | ---                  | Caregiver               | ---                         |

*Note.* Studies are listed twice when more than one intervention group was evaluated in reference to a comparison. CA = chronological age, LA = Language age equivalent, --- = Information was not reported.

## Supplementary Figure S1

Forest plot of RVE summary estimate for cognitive outcomes

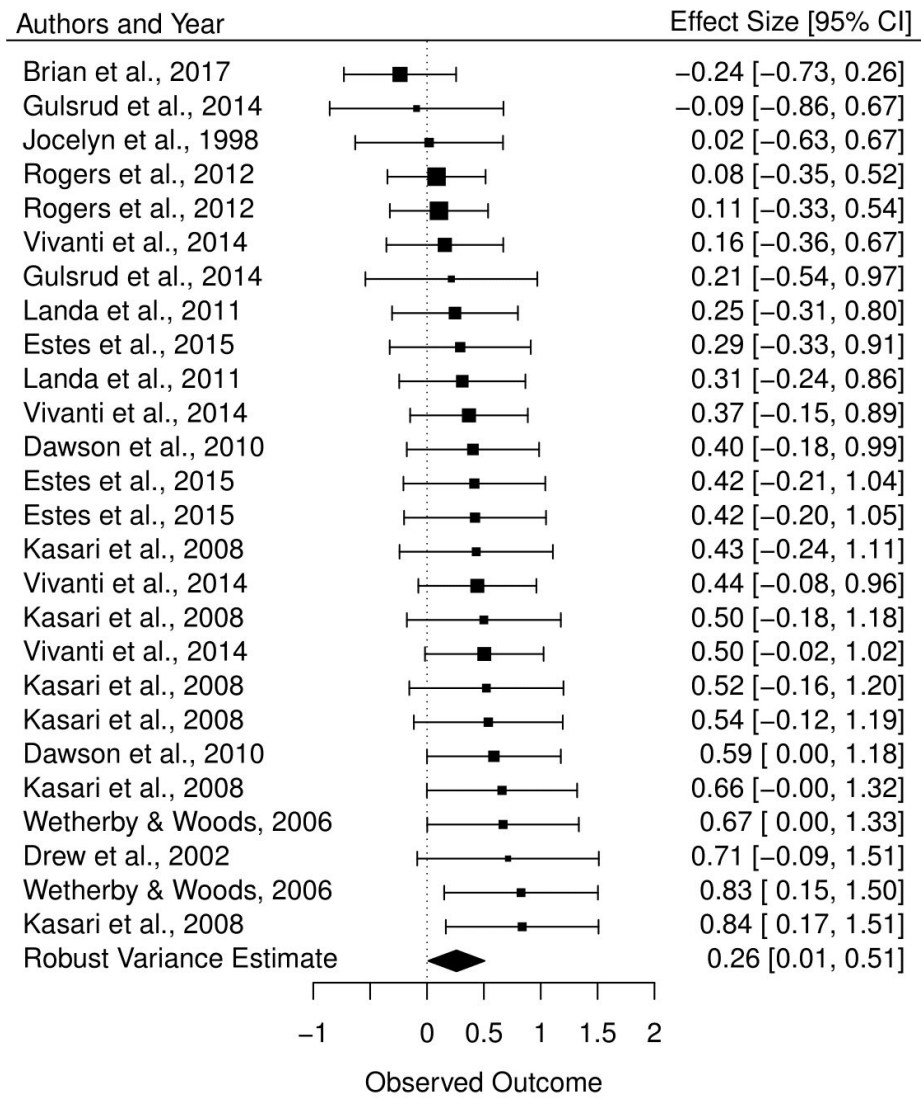

**Supplementary Figure S2**

*Forest plot of RVE summary estimate for ASD symptomatology outcomes*

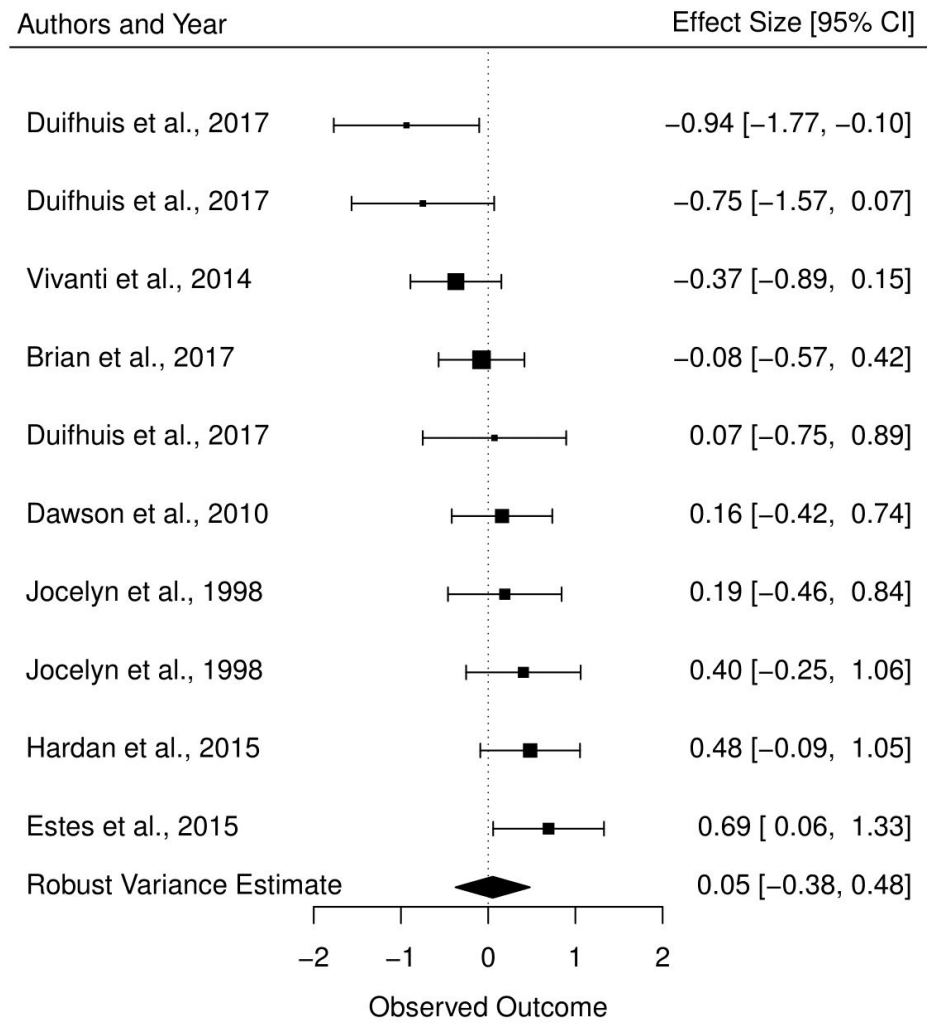

**Supplementary Figure S3**

*Forest plot of RVE summary estimate for adaptive behavior outcomes*

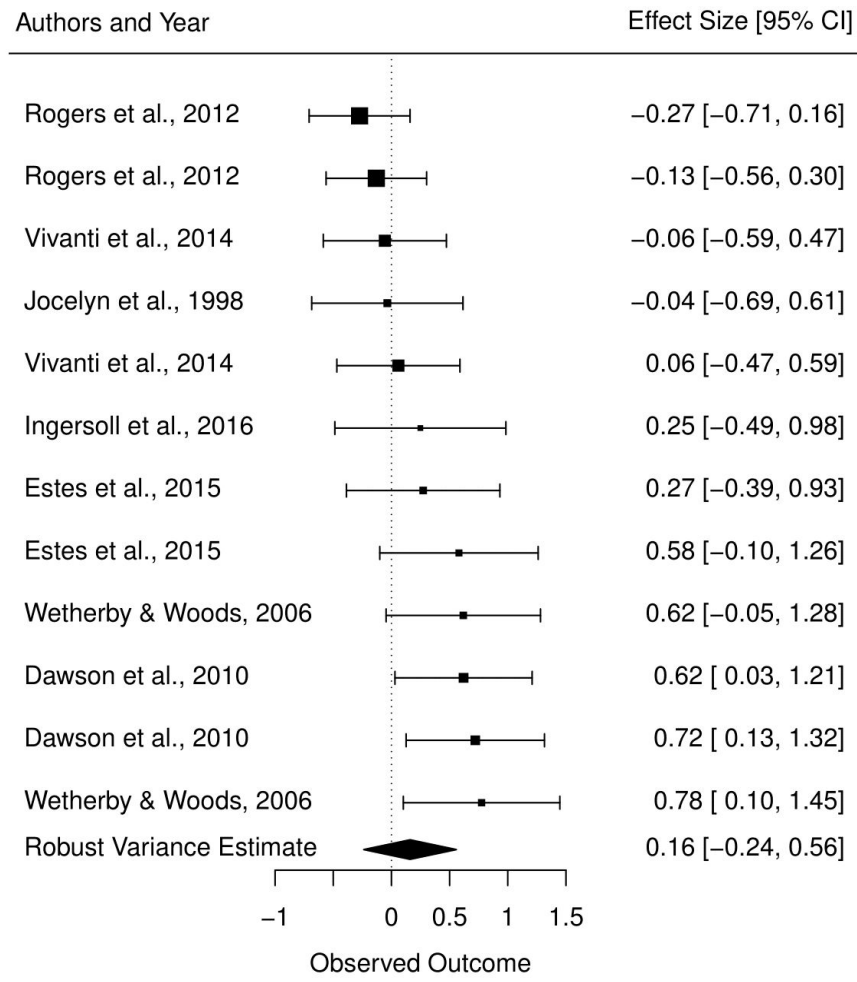

**Supplementary Figure S4**

*Forest plot of RVE summary estimate for social-emotional and challenging behavior outcomes*

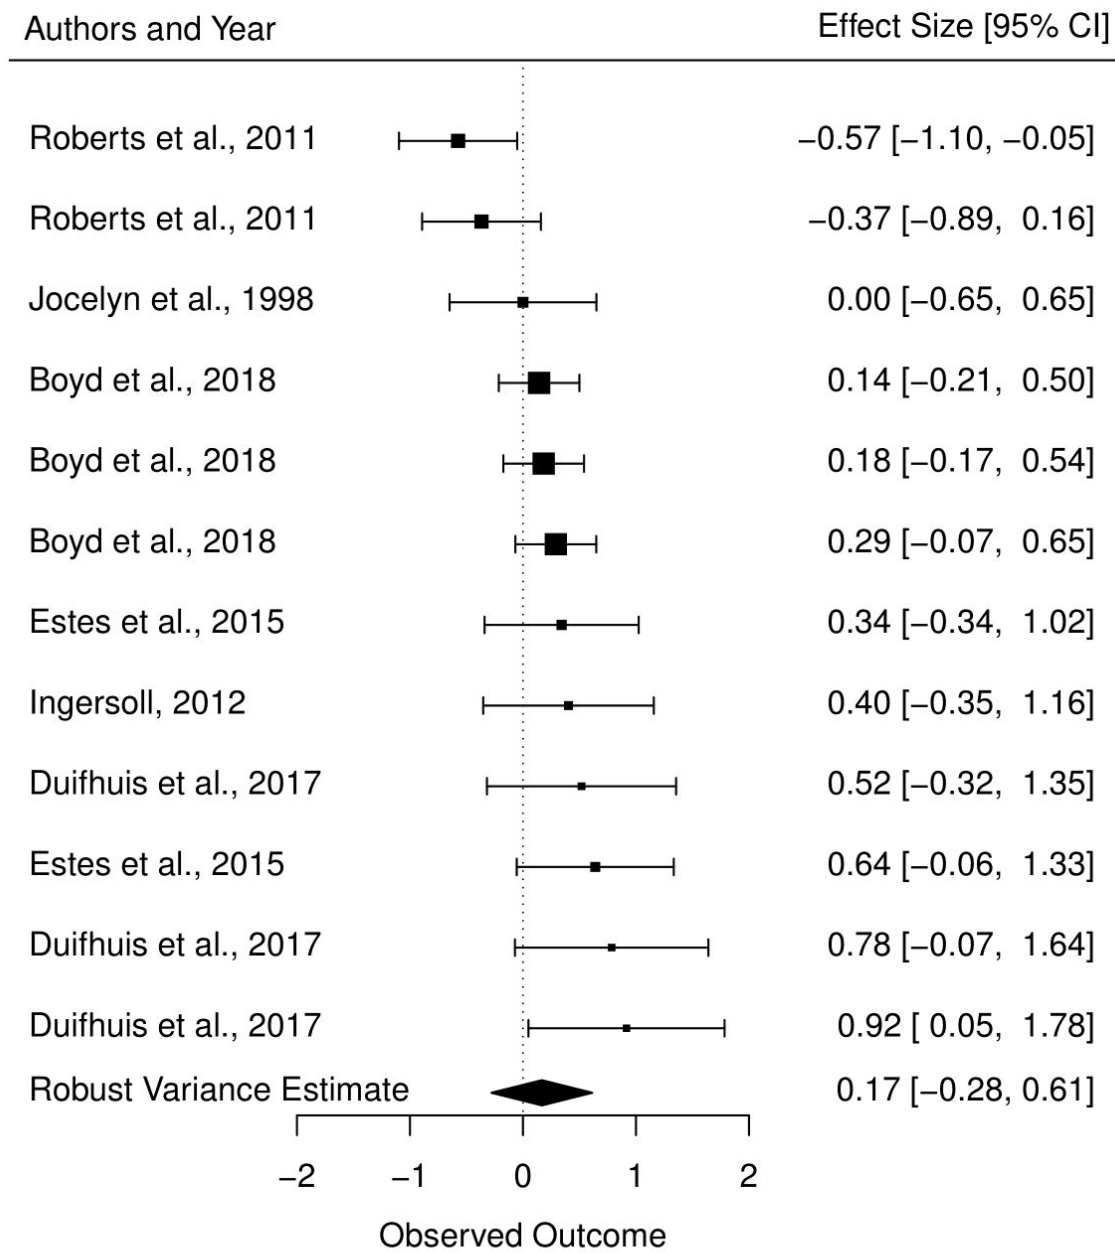

Supplementary Figure S5

Forest plot of RVE summary estimate for play skill outcomes

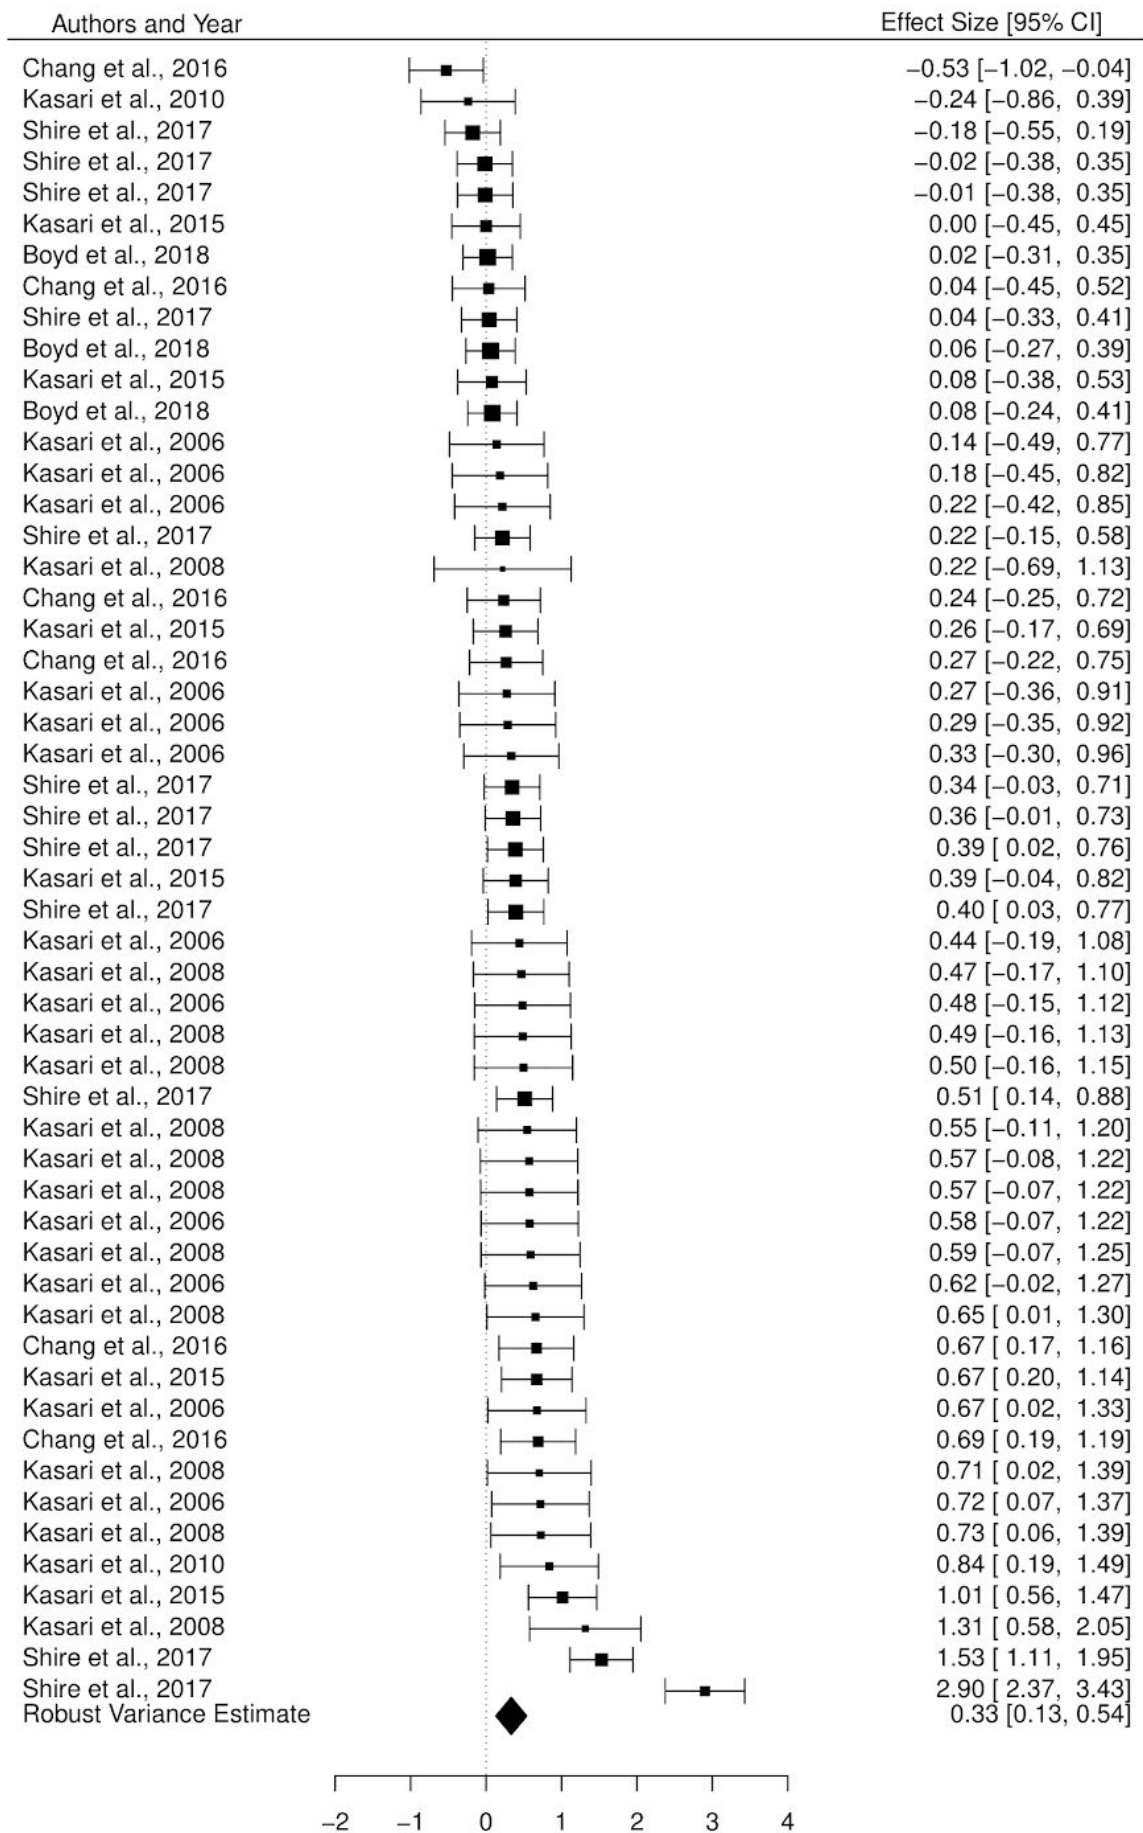

**Supplementary Figure S6**

*Forest plot of RVE summary estimate for restricted and repetitive behavior outcomes*

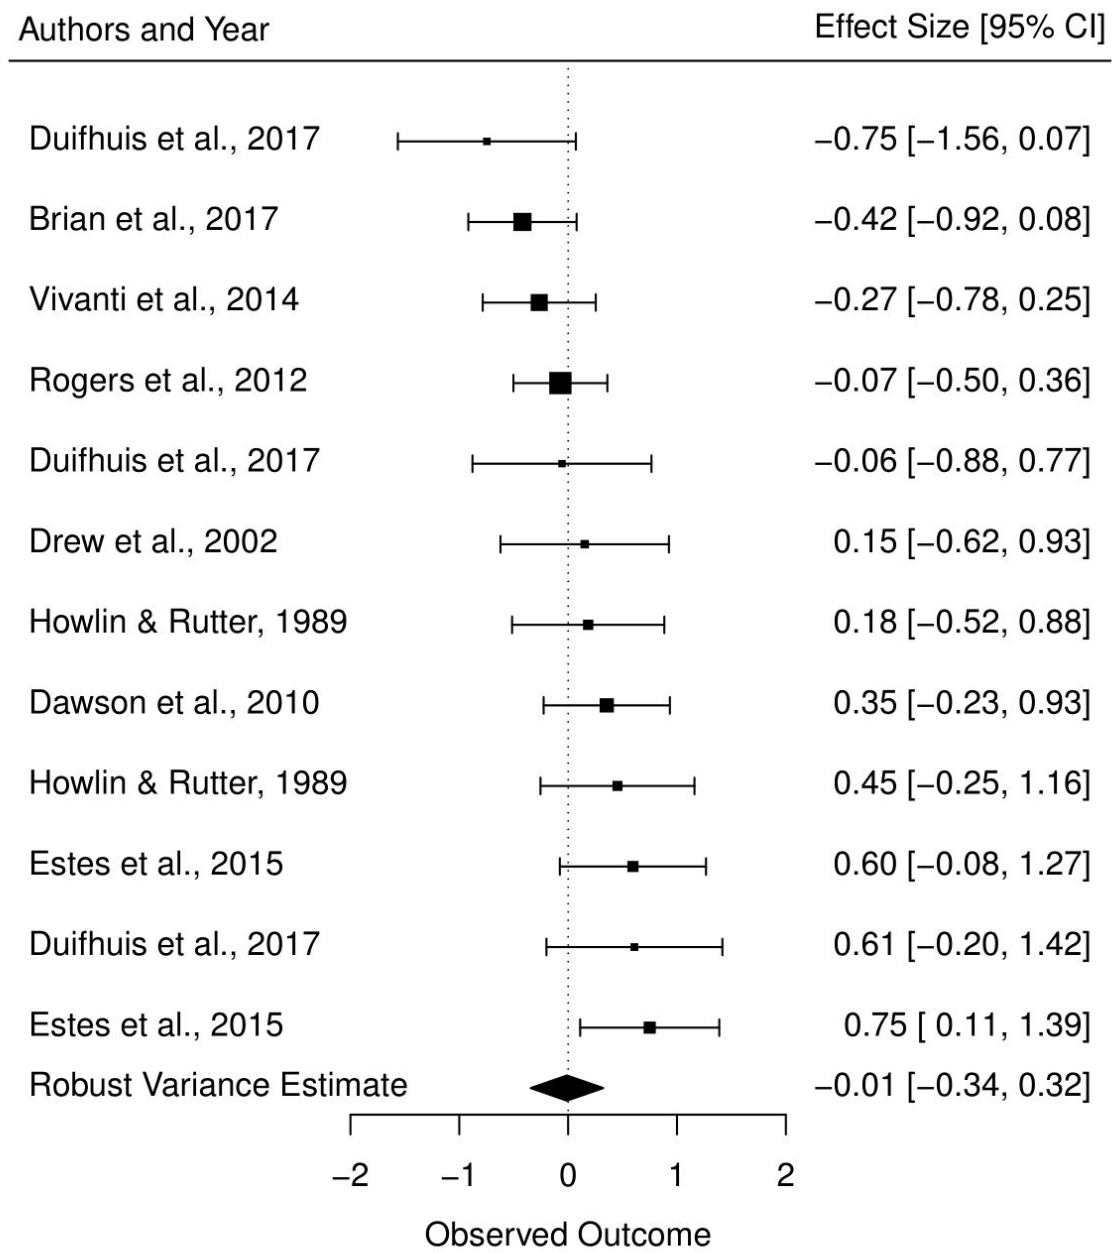

## Supplementary Figure S7

### Forest plot of RVE summary estimate for language outcomes

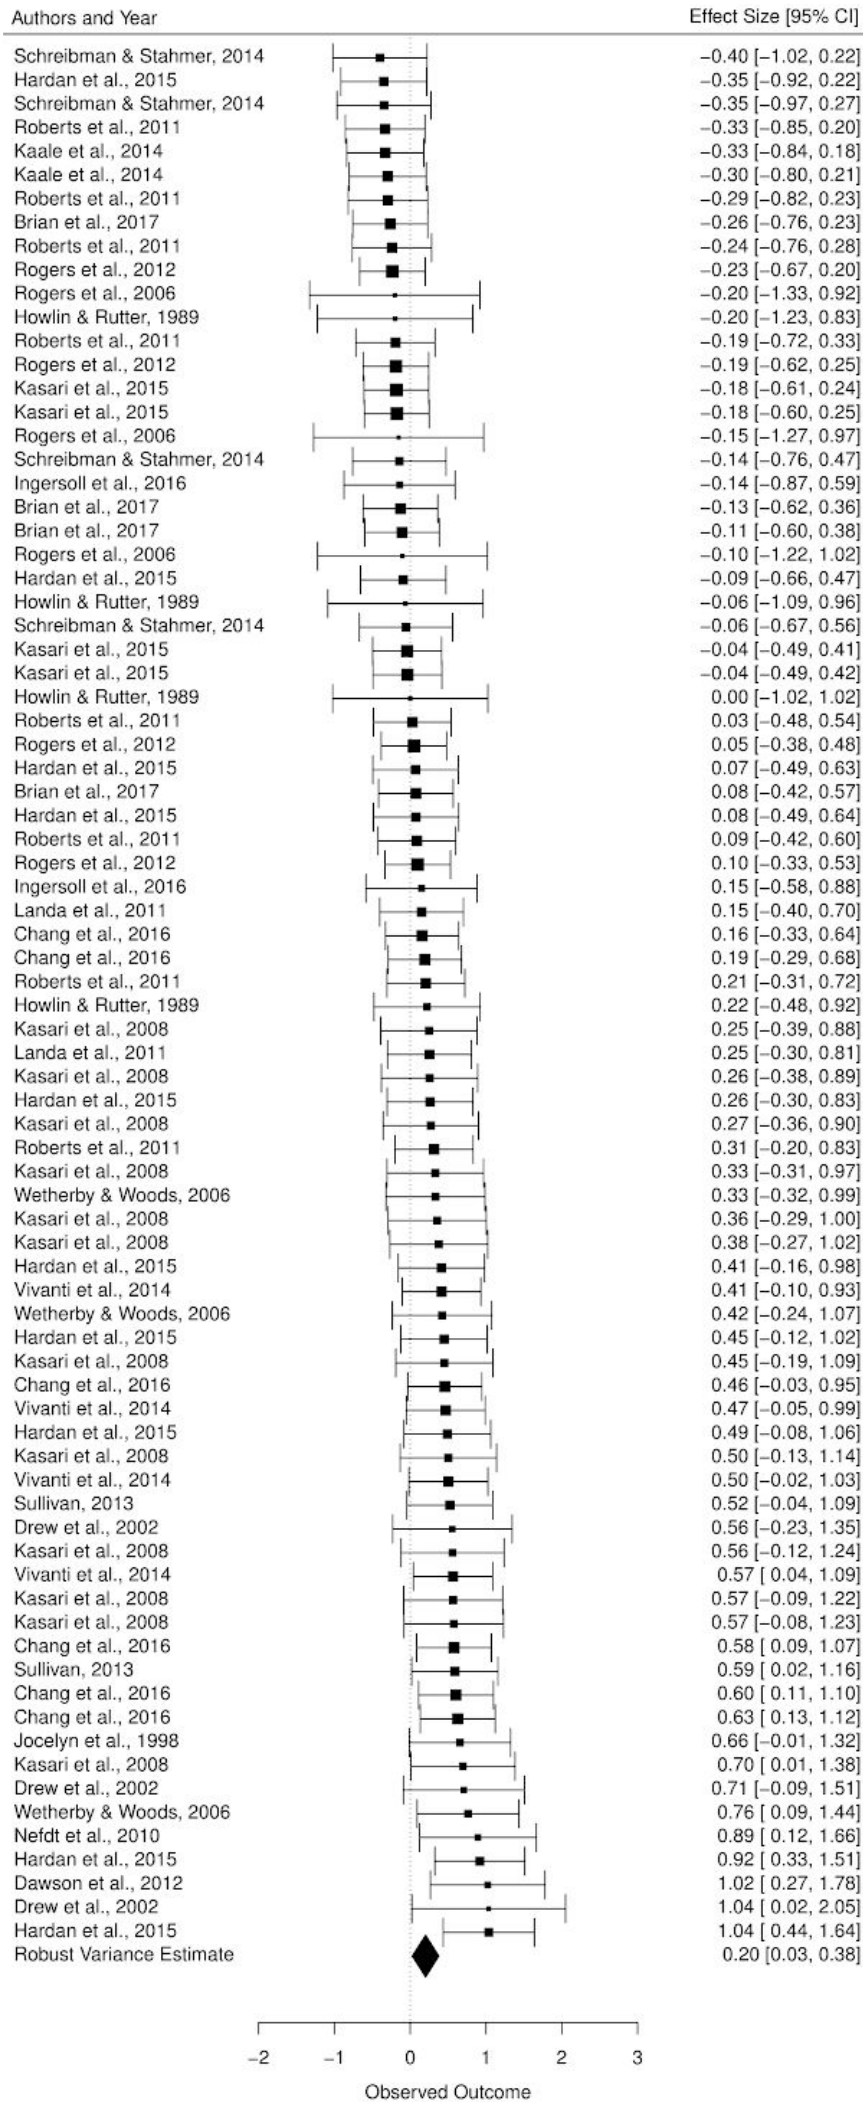



Supplementary Figure S8

Forest plot of RVE summary estimate for social communication outcomes

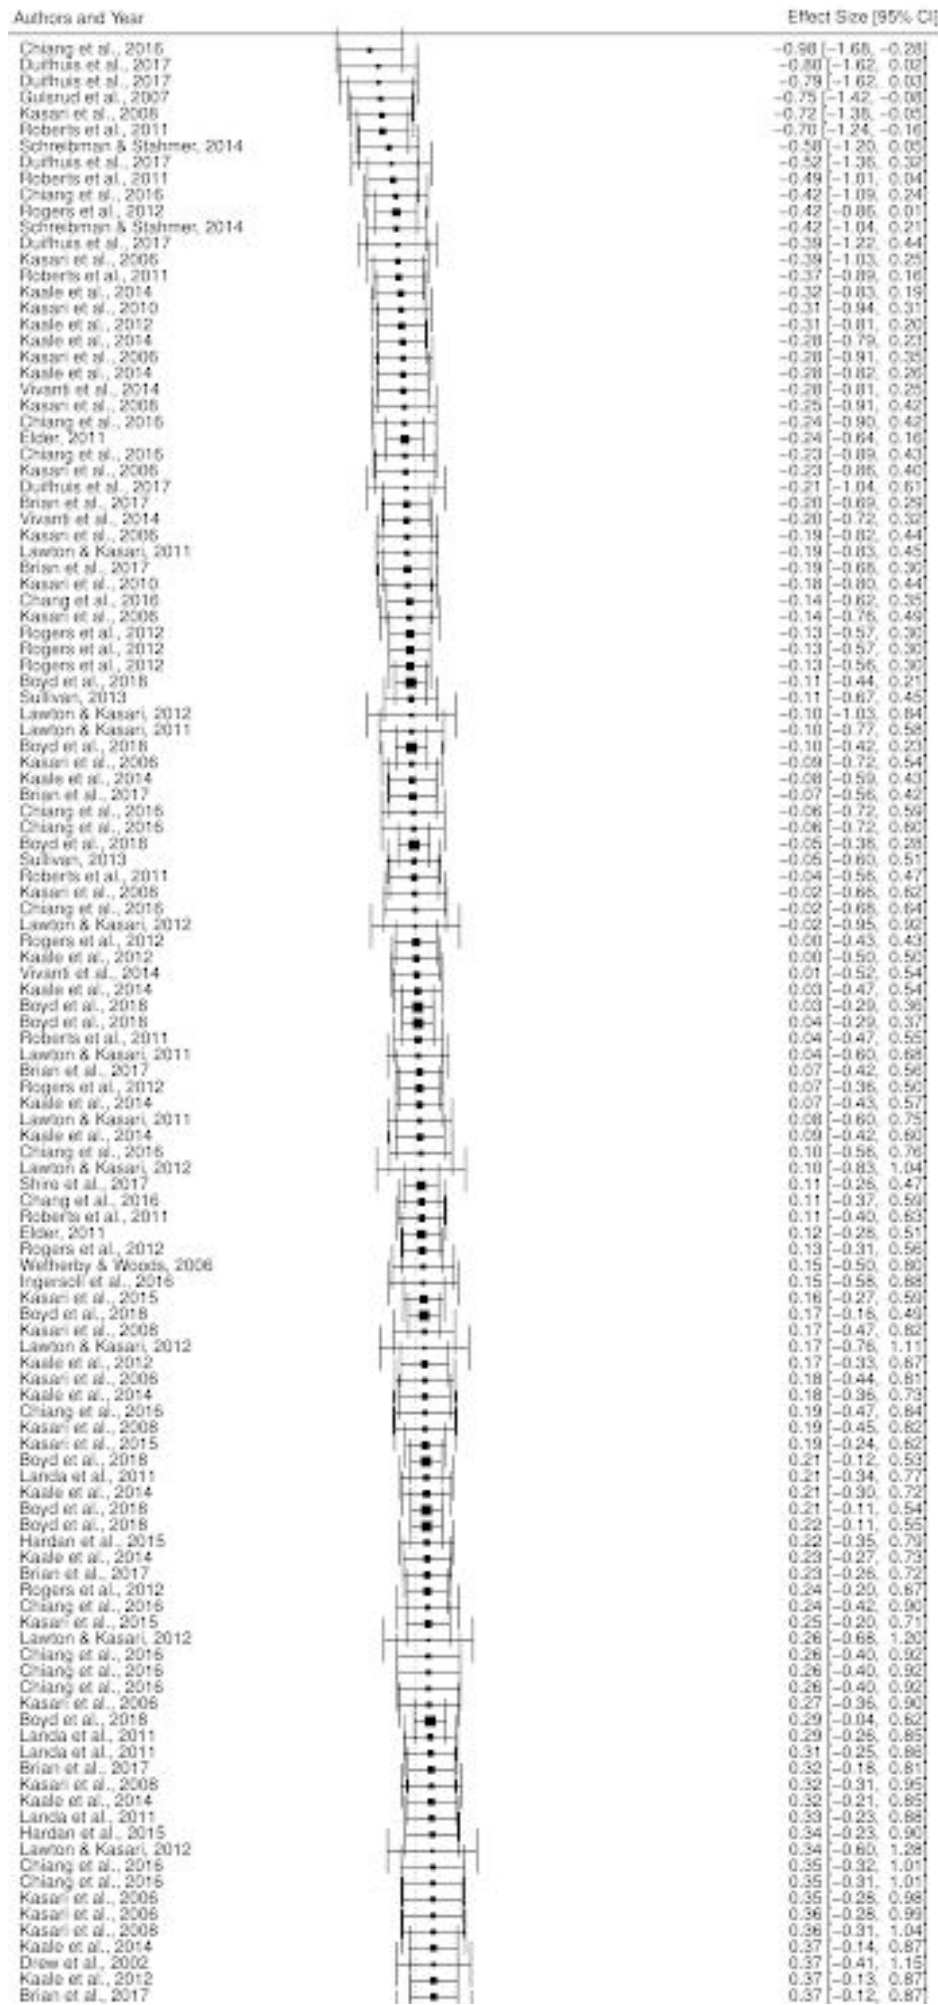

Drow et al., 2002  
 Shire et al., 2017  
 Kaale et al., 2014  
 Lawton & Kasari, 2011  
 Kasari et al., 2006  
 Lande et al., 2011  
 Estes et al., 2015  
 Kasari et al., 2006  
 Wetherby & Woods, 2006  
 Hardan et al., 2015  
 Kasari et al., 2008  
 Hardan et al., 2015  
 Kasari et al., 2006  
 Kasari et al., 2006  
 Kasari et al., 2006  
 Kasari et al., 2006  
 Duijhuys et al., 2017  
 Lawton & Kasari, 2012  
 Lawton & Kasari, 2012  
 Kasari et al., 2006  
 Kasari et al., 2008  
 Chang et al., 2016  
 Kasari et al., 2008  
 Kaale et al., 2014  
 Kasari et al., 2006  
 Kasari et al., 2006  
 Lawton & Kasari, 2011  
 Chiang et al., 2016  
 Dawson et al., 2010  
 Kaale et al., 2012  
 Estes et al., 2015  
 Estes et al., 2015  
 Howlin & Rutter, 1989  
 Drow et al., 2002  
 Lawton & Kasari, 2011  
 Shire et al., 2016  
 Lawton & Kasari, 2011  
 Chiang et al., 2016  
 Stadnick et al., 2015  
 Stadnick et al., 2015  
 Kasari et al., 2008  
 Kasari et al., 2006  
 Lawton & Kasari, 2012  
 Wetherby & Woods, 2006  
 Estes et al., 2015  
 Dawson et al., 2010  
 Ingersoll et al., 2016  
 Chiang et al., 2016  
 Chiang et al., 2016  
 Kasari et al., 2008  
 Ingersoll, 2012  
 Kasari et al., 2006  
 Lawton & Kasari, 2012  
 Wetherby & Woods, 2006  
 Kasari et al., 2008  
 Lande et al., 2011  
 Chang et al., 2016  
 Lawton & Kasari, 2011  
 Kasari et al., 2015  
 Wetherby & Woods, 2006  
 Ingersoll, 2012  
 Kasari et al., 2006  
 Lawton & Kasari, 2011  
 Kasari et al., 2008  
 Gulrud et al., 2007  
 Dawson et al., 2012  
 Dawson et al., 2012  
 Wetherby & Woods, 2006  
 Kasari et al., 2008  
 Chang et al., 2016  
 Kasari et al., 2010  
 Wetherby & Woods, 2006  
 Ingersoll, 2012  
 Wetherby & Woods, 2006  
 Brian et al., 2017  
 Kasari et al., 2008  
 Shire et al., 2017  
 Ingersoll, 2012  
 Brian et al., 2017  
 Wetherby & Woods, 2006  
 Brian et al., 2017  
 Shire et al., 2016  
 Kasari et al., 2008  
 Dawson et al., 2012  
 Wetherby & Woods, 2006  
 Lawton & Kasari, 2012  
 Kasari et al., 2010  
 Ingersoll, 2012  
 Kasari et al., 2008  
 Lawton & Kasari, 2012  
 Kasari et al., 2006  
 Shire et al., 2017  
 Ingersoll, 2012  
 Hardan et al., 2015  
 Wetherby & Woods, 2006  
 Lawton & Kasari, 2011  
 Wetherby & Woods, 2006  
 Dawson et al., 2012  
 Shire et al., 2017  
 Dawson et al., 2012  
 Lawton & Kasari, 2011  
 Lawton & Kasari, 2012  
 Lawton & Kasari, 2012  
 Ingersoll, 2010  
 Kasari et al., 2015  
 Lawton & Kasari, 2012  
 Ingersoll, 2010  
 Gulrud et al., 2007  
 Lawton & Kasari, 2012  
 Shire et al., 2017  
 Lawton & Kasari, 2012  
 Brian et al., 2017  
 Kasari et al., 2010  
 Robust Variance Estimate

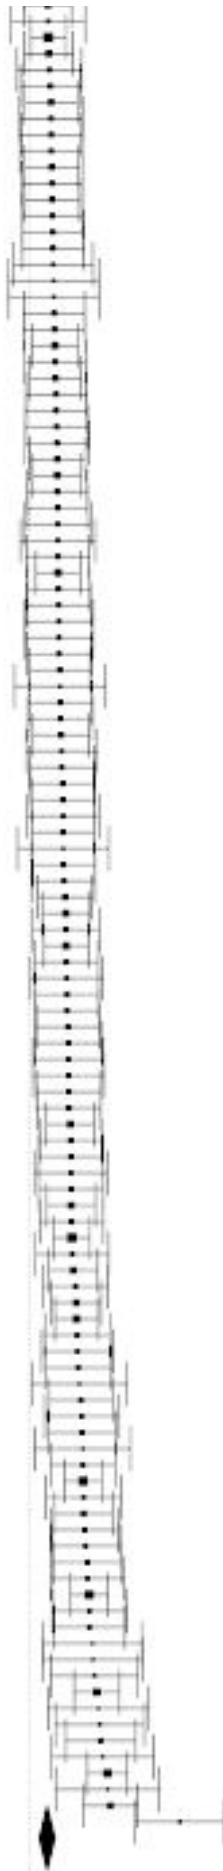

|      |              |      |
|------|--------------|------|
| 0.38 | -0.40        | 1.16 |
| 0.38 | 0.01         | 0.75 |
| 0.39 | -0.13        | 0.90 |
| 0.40 | -0.28        | 1.09 |
| 0.43 | -0.20        | 1.06 |
| 0.44 | -0.12        | 1.00 |
| 0.44 | -0.22        | 1.11 |
| 0.44 | -0.19        | 1.08 |
| 0.44 | -0.21        | 1.10 |
| 0.45 | -0.12        | 1.02 |
| 0.46 | -0.18        | 1.10 |
| 0.46 | -0.11        | 1.03 |
| 0.46 | -0.17        | 1.10 |
| 0.48 | -0.16        | 1.12 |
| 0.48 | -0.16        | 1.12 |
| 0.48 | -0.35        | 1.32 |
| 0.49 | -0.45        | 1.44 |
| 0.50 | -0.45        | 1.45 |
| 0.51 | -0.14        | 1.15 |
| 0.51 | -0.13        | 1.15 |
| 0.52 | 0.03         | 1.01 |
| 0.53 | -0.12        | 1.17 |
| 0.53 | -0.00        | 1.07 |
| 0.55 | -0.09        | 1.18 |
| 0.55 | -0.10        | 1.19 |
| 0.56 | -0.10        | 1.21 |
| 0.56 | -0.11        | 1.24 |
| 0.57 | -0.02        | 1.15 |
| 0.57 | 0.06         | 1.08 |
| 0.57 | -0.06        | 1.20 |
| 0.58 | -0.05        | 1.21 |
| 0.58 | -0.13        | 1.29 |
| 0.58 | -0.21        | 1.37 |
| 0.58 | -0.07        | 1.24 |
| 0.59 | 0.12         | 1.05 |
| 0.60 | -0.06        | 1.25 |
| 0.60 | -0.07        | 1.27 |
| 0.60 | -0.11        | 1.32 |
| 0.60 | -0.11        | 1.32 |
| 0.61 | -0.08        | 1.29 |
| 0.62 | -0.02        | 1.27 |
| 0.63 | -0.33        | 1.59 |
| 0.63 | -0.03        | 1.30 |
| 0.64 | -0.05        | 1.32 |
| 0.65 | 0.06         | 1.24 |
| 0.66 | -0.09        | 1.41 |
| 0.67 | -0.01        | 1.34 |
| 0.68 | 0.01         | 1.36 |
| 0.69 | 0.03         | 1.35 |
| 0.69 | -0.06        | 1.45 |
| 0.69 | 0.04         | 1.34 |
| 0.69 | -0.27        | 1.66 |
| 0.70 | 0.03         | 1.36 |
| 0.71 | 0.05         | 1.37 |
| 0.73 | 0.16         | 1.30 |
| 0.75 | 0.25         | 1.25 |
| 0.75 | 0.05         | 1.45 |
| 0.76 | 0.29         | 1.23 |
| 0.76 | 0.09         | 1.43 |
| 0.76 | 0.00         | 1.52 |
| 0.77 | 0.12         | 1.43 |
| 0.77 | 0.11         | 1.44 |
| 0.80 | 0.14         | 1.45 |
| 0.80 | 0.10         | 1.50 |
| 0.80 | 0.07         | 1.54 |
| 0.81 | 0.07         | 1.55 |
| 0.81 | 0.14         | 1.49 |
| 0.81 | 0.14         | 1.48 |
| 0.84 | 0.34         | 1.35 |
| 0.85 | 0.20         | 1.50 |
| 0.86 | 0.18         | 1.53 |
| 0.86 | 0.09         | 1.63 |
| 0.86 | 0.18         | 1.54 |
| 0.86 | 0.35         | 1.38 |
| 0.87 | 0.20         | 1.54 |
| 0.87 | 0.49         | 1.26 |
| 0.88 | 0.11         | 1.63 |
| 0.90 | 0.39         | 1.42 |
| 0.96 | 0.27         | 1.64 |
| 0.97 | 0.45         | 1.49 |
| 0.98 | 0.52         | 1.43 |
| 0.99 | 0.31         | 1.67 |
| 0.99 | 0.24         | 1.75 |
| 1.01 | 0.32         | 1.70 |
| 1.04 | 0.04         | 2.04 |
| 1.07 | 0.40         | 1.74 |
| 1.09 | 0.30         | 1.87 |
| 1.09 | 0.37         | 1.80 |
| 1.10 | 0.09         | 2.11 |
| 1.11 | 0.43         | 1.79 |
| 1.11 | 0.72         | 1.50 |
| 1.12 | 0.33         | 1.91 |
| 1.12 | 0.52         | 1.73 |
| 1.15 | 0.45         | 1.85 |
| 1.16 | 0.43         | 1.90 |
| 1.20 | 0.49         | 1.91 |
| 1.21 | 0.44         | 1.98 |
| 1.24 | 0.04         | 1.64 |
| 1.25 | 0.47         | 2.03 |
| 1.25 | 0.51         | 1.99 |
| 1.31 | 0.27         | 2.35 |
| 1.32 | 0.28         | 2.36 |
| 1.35 | 0.43         | 2.27 |
| 1.40 | 0.93         | 1.88 |
| 1.44 | 0.38         | 2.50 |
| 1.47 | 0.53         | 2.40 |
| 1.48 | 0.75         | 2.22 |
| 1.53 | 0.45         | 2.60 |
| 1.62 | 1.20         | 2.05 |
| 1.63 | 0.54         | 2.72 |
| 1.69 | 1.11         | 2.26 |
| 3.15 | 2.21         | 4.09 |
| 0.35 | [0.16, 0.53] |      |

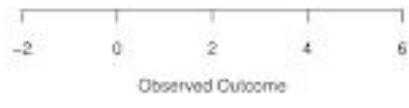

Supplement: NIHMS1774926-supplement-AppendixS1.pdf [file NIHMS1774926-supplement-AppendixS1.pdf]
